# Supplementary material for: Virtual Care in Patients with Cancer: A Systematic Review
Source: MDPI journal article supplement (doi:10.3390/curroncol28050301), 2021-09-08
Supplement: s1 [file s1]

# Virtual Care in Patients with Cancer: A Systematic Review

Simron Singh <sup>1</sup>, Glenn G. Fletcher <sup>2</sup>, Xiaomei Yao <sup>2,3</sup>, Jonathan Sussman <sup>2,\*</sup>

## Supplementary Material

**Table S1.** Literature Search Strategy (Databases).

(1) Database(s): Embase 1996 to 2020 August 06, APA PsycInfo 1987 to July Week 4 2020, EBM Reviews - Cochrane Central Register of Controlled Trials June 2020, EBM Reviews - Cochrane Database of Systematic Reviews 2005 to July 31, 2020, Ovid MEDLINE(R) and Epub Ahead of Print, In-Process & Other Non-Indexed Citations, Daily and Versions(R) 1946 to August 06, 2020

| #  | Searches                                                                                                                                                                                                                                                                                                                                                                                                                | Results |
|----|-------------------------------------------------------------------------------------------------------------------------------------------------------------------------------------------------------------------------------------------------------------------------------------------------------------------------------------------------------------------------------------------------------------------------|---------|
| 1  | exp Telemedicine/ or Remote Consultation/ or exp Teleconsultation/ or exp Telerehabilitation/ or exp Telehealth/                                                                                                                                                                                                                                                                                                        | 86831   |
| 2  | exp Consultation/ or exp Disease Management/ or exp Patient Monitoring/ or exp Follow up/ or exp Patient Care/ or exp "Evaluation and Follow up"/ or exp Medical Examination/ or exp Physical Examination/                                                                                                                                                                                                              | 7619641 |
| 3  | exp Mobile Phone/ or exp Cell Phone/ or exp Mobile Application/ or exp Smartphone/ or exp Teleconference/ or exp Videoconferencing/                                                                                                                                                                                                                                                                                     | 153534  |
| 4  | 1 or (2 and 3)                                                                                                                                                                                                                                                                                                                                                                                                          | 120953  |
| 5  | (Telemedicine or Remote Consultation or Teleconsultation or Telerehabilitation or Telehealth or eHealth or e-Health or mHealth or m-Health or E-oncology).ti,ab.                                                                                                                                                                                                                                                        | 60684   |
| 6  | ((virtual or distance or distant or remote or video or phone or smartphone or cellphone or cell phone or mobile or digital or teleconferenc: or videoconferenc: or computer or internet or online) adj3 (consult: or manage: or monitor: or follow-up or care or evaluat: or exam: or treat: intervene or intervention: or assess: or diagnos: or navigat: or "after-care" or deliver: or service: or contact:)).ti,ab. | 275535  |
| 7  | 4 or 5 or 6                                                                                                                                                                                                                                                                                                                                                                                                             | 389680  |
| 8  | exp Neoplasms/ or exp Neoplasm/ or exp Tumor/ or exp Cancer/ or (Cancer: or Tumor: or Tumour: or Neoplas: or Oncolog: or Metasta: or Malignan: or Carcinom: or Andenocarcinom: or Leukemia: or Leukaemia: or Lymphoma: or Sarcoma: or Melanoma:).ti,ab.                                                                                                                                                                 | 9350508 |
| 9  | 7 and 8                                                                                                                                                                                                                                                                                                                                                                                                                 | 51349   |
| 10 | limit 9 to yr="2015 -Current"                                                                                                                                                                                                                                                                                                                                                                                           | 23160   |
| 11 | 10 not (abstract or "conference abstract" or news: or case report:).pt.                                                                                                                                                                                                                                                                                                                                                 | 17165   |
| 12 | limit 11 to english language [Limit not valid in CDSR; records were retained]                                                                                                                                                                                                                                                                                                                                           | 15698   |
| 13 | limit 11 to no language specified [Limit not valid in APA PsycInfo,CDSR; records were retained]                                                                                                                                                                                                                                                                                                                         | 1498    |
| 14 | limit 11 to French [Limit not valid in CDSR; records were retained]                                                                                                                                                                                                                                                                                                                                                     | 89      |
| 15 | 12 or 13 or 14                                                                                                                                                                                                                                                                                                                                                                                                          | 16665   |
| 16 | limit 15 to yr="2015-2016"                                                                                                                                                                                                                                                                                                                                                                                              | 4705    |
| 17 | limit 15 to yr="2017-2018"                                                                                                                                                                                                                                                                                                                                                                                              | 5876    |
| 18 | limit 15 to yr="2019"                                                                                                                                                                                                                                                                                                                                                                                                   | 3166    |
| 19 | 16 or 17 or 18                                                                                                                                                                                                                                                                                                                                                                                                          | 13747   |
| 20 | 15 not 19                                                                                                                                                                                                                                                                                                                                                                                                               | 2918    |
| 21 | remove duplicates from 16                                                                                                                                                                                                                                                                                                                                                                                               | 2921    |
| 22 | remove duplicates from 17                                                                                                                                                                                                                                                                                                                                                                                               | 3703    |

|    |                           |       |
|----|---------------------------|-------|
| 23 | remove duplicates from 18 | 2025  |
| 24 | remove duplicates from 20 | 1803  |
| 25 | 21 or 22 or 23 or 24      | 10452 |

(2) Database(s): EBM Reviews - Cochrane Database of Systematic Reviews 2005 to August 1, 2020 Search Strategy:

| # | Searches                                                                                                                                                                                                                                                                                                                                                                                                                | Results |
|---|-------------------------------------------------------------------------------------------------------------------------------------------------------------------------------------------------------------------------------------------------------------------------------------------------------------------------------------------------------------------------------------------------------------------------|---------|
| 1 | (Telemedicine or Remote Consultation or Teleconsultation or Telerehabilitation or Telehealth or eHealth or e-Health or mHealth or m-Health or E-oncology).ti,ab.                                                                                                                                                                                                                                                        | 23      |
| 2 | ((virtual or distance or distant or remote or video or phone or smartphone or cellphone or cell phone or mobile or digital or teleconferenc: or videoconferenc: or computer or internet or online) adj3 (consult: or manage: or monitor: or follow-up or care or evaluat: or exam: or treat: intervene or intervention: or assess: or diagnos: or navigat: or "after-care" or deliver: or service: or contact:)).ti,ab. | 116     |
| 3 | (Cancer: or Tumor: or Tumour: or Neoplas: or Oncolog: or Metasta: or Malignan: or Carcinom: or Andenocarcinom: or Leukemia: or Leukaemia: or Lymphoma: or Sarcoma: or Melanoma:).ti,ab.                                                                                                                                                                                                                                 | 1279    |
| 4 | 1 or 2                                                                                                                                                                                                                                                                                                                                                                                                                  | 130     |
| 5 | 3 and 4                                                                                                                                                                                                                                                                                                                                                                                                                 | 16      |

(3) CINAHL: July 29, 2020

|    | Search Terms                                                                                                                                                                                                                                                                                                                                                                                                                                                                                                                                                                                                                                                                                                                                                                                                                        | Actions   |
|----|-------------------------------------------------------------------------------------------------------------------------------------------------------------------------------------------------------------------------------------------------------------------------------------------------------------------------------------------------------------------------------------------------------------------------------------------------------------------------------------------------------------------------------------------------------------------------------------------------------------------------------------------------------------------------------------------------------------------------------------------------------------------------------------------------------------------------------------|-----------|
| S1 | (MH "Telehealth") OR (MH "Telemedicine+") OR (MH "Telerehabilitation") or (MH "Telenursing") or (MH "Remote Consultation")                                                                                                                                                                                                                                                                                                                                                                                                                                                                                                                                                                                                                                                                                                          | (6,890)   |
| S2 | ((virtual or distance or distant or remote or video or phone or smartphone or cellphone or cell phone or mobile or digital or teleconferenc: or videoconferenc: or computer or internet or online) N3 (consult: or manage: or monitor: or follow-up or care or evaluat: or exam: or treat: intervene or intervention: or assess: or diagnos: or navigat: or "after-care" or deliver: or service: or contact:)) OR AB ((virtual or distance or distant or remote or video or phone or smartphone or cellphone or cell phone or mobile or digital or teleconferenc: or videoconferenc: or computer or internet or online) N3 (consult: or manage: or monitor: or follow-up or care or evaluat: or exam: or treat: intervene or intervention: or assess: or diagnos: or navigat: or "after-care" or deliver: or service: or contact:)) | (6,013)   |
| S3 | TI ( (Telemedicine or Remote Consultation or Teleconsultation or Telerehabilitation or Telehealth or eHealth or e-Health or mHealth or m-Health or E-oncology) ) OR AB ( (Telemedicine or Remote Consultation or Teleconsultation or Telerehabilitation or Telehealth or eHealth or e-Health or mHealth or m-Health or E-oncology) )                                                                                                                                                                                                                                                                                                                                                                                                                                                                                                | (4,716)   |
| S4 | ((MH "Oncologic Nursing+") OR (MH "Oncologic Care+") OR (MH "Cancer Patients") OR (MH "Oncology+") OR (MH "Neoplasms+")) OR TI ( (Cancer: or Tumor: or Tumour: or Neoplas: or Oncolog: or Metasta: or Malignan: or Carcinom: or Andenocarcinom: or Leukemia: or Leukaemia: or Lymphoma: or Sarcoma: or Melanoma:)) OR AB ( (Cancer: or Tumor: or Tumour: or Neoplas: or Oncolog: or Metasta: or Malignan: or Carcinom: or Andenocarcinom: or Leukemia: or Leukaemia: or Lymphoma: or Sarcoma: or Melanoma:))                                                                                                                                                                                                                                                                                                                        | (135,700) |
| S5 | S1 OR S2 OR S3                                                                                                                                                                                                                                                                                                                                                                                                                                                                                                                                                                                                                                                                                                                                                                                                                      | (13,959)  |
| S6 | S4 AND S5                                                                                                                                                                                                                                                                                                                                                                                                                                                                                                                                                                                                                                                                                                                                                                                                                           | (790)     |

Above is limited to 2015- 2020, and excludes citations from Medline.

(4). Search terms for ongoing trials on clinicaltrials.gov included in-person, virtual care, telemedicine, and telephone (one term each time).

Table S2. Ongoing trials.

| Author and source; trial name; recruitment or follow-up period; estimated study completion date                                                                                                                               | # Patients anticipated                                                 | Patient characteristics                                                                                                                                                                                                                                                                                                                                                            | Trial type and comparison                                                                                                                                                                                                                                                                                           | Outcome                                                                                                                                                                                                                                                                                                                                                                                                                                                |
|-------------------------------------------------------------------------------------------------------------------------------------------------------------------------------------------------------------------------------|------------------------------------------------------------------------|------------------------------------------------------------------------------------------------------------------------------------------------------------------------------------------------------------------------------------------------------------------------------------------------------------------------------------------------------------------------------------|---------------------------------------------------------------------------------------------------------------------------------------------------------------------------------------------------------------------------------------------------------------------------------------------------------------------|--------------------------------------------------------------------------------------------------------------------------------------------------------------------------------------------------------------------------------------------------------------------------------------------------------------------------------------------------------------------------------------------------------------------------------------------------------|
| Chau, 2019 [1]<br>REACH PC<br>NCT03375489<br>Massachusetts General Hospital + 19 other sites<br>2018-2022 (estimated)<br>Estimated completion May 31 2023                                                                     | 1250 patients<br>Up to 1250 caregivers if patient chose to invite them | Advanced non-small cell lung cancer within 12 weeks of diagnosis and being treated with non-curative intent.<br>Recruited through 20 Palliative Care Research Cooperative institutions in USA.<br>Patients may invite caregiver (family or friend who lives with them or contact at least twice a week) to participate with them.                                                  | RCT.<br>Telehealth by videoconferencing early palliative care (monthly) vs. in-person early palliative care (monthly) by specialty-trained experienced or board-certified PC physicians or advanced practice nurses who provide care in the outpatient oncology setting. Initial visit for both groups is in-person | QoL, mood, and quality of communication with oncologists at baseline before randomization and at 12, 24, 36, and 48 weeks<br>Health care utilization, including length of stay in hospice, will be collected from patients' health records                                                                                                                                                                                                             |
| Telemedicine Nurse-Led Intervention for Rural Cancer Survivors (CARING) [2]<br>NCT04267627<br>University of Virginia<br>2020-2025 (estimated)<br>Estimated completion January 1, 2026                                         | 450                                                                    | Patients with head and neck cancer at any stage who completed treatment within the last 6 weeks or anticipated to be within 3 months of end of treatment<br>Plan to oversample rural patients                                                                                                                                                                                      | RCT (3 arm)<br>Nurse-lead supportive care (CARING) by telemedicine videoconferencing vs. CARING in-person vs. usual care                                                                                                                                                                                            | Unmet needs, QoL (FACT-HN)<br>Cost effectiveness<br>Patient perceptions of telemedicine                                                                                                                                                                                                                                                                                                                                                                |
| Telehealth for palliative care patients in metropolitan and rural settings [3]<br>ACTRN12618001007224<br>HREC/18/MonH/348<br>2018-2020 (anticipated)<br>Monash, Victoria, Australia<br>Estimated completion date not reported | 140                                                                    | Patients admitted to an associated community palliative care service, a Monash Health inpatient palliative care unit, or engaged with a Monash Health palliative care consult service or the Monash Health Oncology Support-including community palliative Care Outpatient Clinic.<br>Diagnosed with life-limiting illness (cancer, cardiovascular, musculoskeletal, neurological) | RCT.<br>Telehealth videoconference with palliative care physician and nurse facilitation at 2 weeks then as required for 3 months vs. standard care (usual care provided including community palliative care, other community services, hospital services, specialists, and general practice)                       | Clinical symptoms (sleep, nausea, pain, fatigue, breathing problems, bowel problems), QoL, Performance Status (Karnofsky),<br>Secondary outcomes: emergency department attendances, teleconference efficiency (setup), user experience, health professional score of symptom severity (pain, other symptoms, psycho-spiritual distress, carer distress), QoL (family), Hospital Anxiety and Depression Scale, hospital admissions, home visit duration |

| Author and source; trial name; recruitment or follow-up period; estimated study completion date                                                                                                                                                                 | # Patients anticipated | Patient characteristics                                                                         | Trial type and comparison                                                                                                                                                                                                   | Outcome                                                                                                                 |
|-----------------------------------------------------------------------------------------------------------------------------------------------------------------------------------------------------------------------------------------------------------------|------------------------|-------------------------------------------------------------------------------------------------|-----------------------------------------------------------------------------------------------------------------------------------------------------------------------------------------------------------------------------|-------------------------------------------------------------------------------------------------------------------------|
| Supportive Care Delivered by Telemedicine to Cancer Patients at Home [4]<br>NCT04136340<br>2019-2021 (estimated)<br>Rockefeller Outpatient Pavilion, Memorial Sloan Kettering Cancer Center, New York<br>Estimated completion October, 2023                     | 466                    | Cancer; planned for Supportive Care Service, resident of New York, New Jersey, or Connecticut   | RCT, non-inferiority pilot trial<br>Supportive palliative care specialist in-person for first visit then follow-up care by in-home video telemedicine vs. in-person at clinic.<br>At least 3 follow-up visits over 14 weeks | Health-related QoL (FACT-G) at baseline and week 14                                                                     |
| Assessing the System for High-Intensity Evaluation During Radiotherapy During Changes in Response to COVID-19 (CORONA-SHIELD) [5]<br>NCT04357574<br>Duke Cancer Center, Durham, North Carolina, USA<br>2020-2021 (estimated)<br>Estimated completion April 2022 | 1000                   | Patients undergoing radiation oncology during COVID-19 outbreak; no concurrent systemic therapy | Observational study<br>Patients during COVID-19 outbreak and their healthcare provider experience<br>Comparison of rates of acute care for telehealth (telephone or video) vs. prior rates                                  | Healthcare provider perceptions of telehealth<br>Rates of acute care (emergency department visits and hospitalizations) |

**Table S3.** Summary Table for Risk of Bias Assessment for Randomized Controlled Trials.

| Study                                                                   | Outcome                                                           | Domain 1:<br>Randomiza-<br>tion Process | Domain 2:<br>Deviation<br>from Inter-<br>vention | Domain 3:<br>Missing<br>Outcome<br>Data | Domain 4:<br>Measure-<br>ment of<br>Outcome | Domain 5:<br>Reported<br>Results | Overall Risk of Bias |           |
|-------------------------------------------------------------------------|-------------------------------------------------------------------|-----------------------------------------|--------------------------------------------------|-----------------------------------------|---------------------------------------------|----------------------------------|----------------------|-----------|
|                                                                         |                                                                   |                                         |                                                  |                                         |                                             |                                  | Per out-<br>come     | Per study |
| Lleras de<br>Frutos, 2020<br>[6]                                        | Emotional dis-<br>tress                                           | Some con-<br>cerns                      | Some con-<br>cerns                               | High                                    | Low                                         | Low                              | High                 | High      |
|                                                                         | Post-traumatic<br>stress                                          | Some con-<br>cerns                      | Some con-<br>cerns                               | High                                    | Low                                         | Low                              | High                 |           |
|                                                                         | Post-traumatic<br>growth                                          | Some con-<br>cerns                      | Some con-<br>cerns                               | High                                    | Low                                         | Low                              | High                 |           |
| Watson, 2017<br>[7]                                                     | Anxiety and<br>depression                                         | Low                                     | Some con-<br>cerns                               | High                                    | Low                                         | Low                              | High                 | High      |
|                                                                         | Mental adjust-<br>ment to cancer                                  | Low                                     | Some con-<br>cerns                               | High                                    | Low                                         | Low                              | High                 |           |
|                                                                         | Cancer con-<br>cerns                                              | Low                                     | Some con-<br>cerns                               | High                                    | Low                                         | Low                              | High                 |           |
|                                                                         | Cancer coping<br>questionnaire                                    | Low                                     | Some con-<br>cerns                               | High                                    | Low                                         | Low                              | High                 |           |
| Harrigan,<br>2016 [8]                                                   | Body composi-<br>tion                                             | Some con-<br>cerns                      | High                                             | High                                    | Low                                         | Low                              | High                 | High      |
|                                                                         | Physical activ-<br>ity                                            | Some con-<br>cerns                      | High                                             | High                                    | Low                                         | Low                              | High                 |           |
|                                                                         | Diet                                                              | Some con-<br>cerns                      | High                                             | High                                    | Low                                         | Low                              | High                 |           |
|                                                                         | Serum bi-<br>omarkers                                             | Some con-<br>cerns                      | High                                             | High                                    | Low                                         | Low                              | High                 |           |
| Buchanan,<br>2015 [9];<br>Datta, 2011<br>[10]                           | Cost                                                              | Low                                     | Low                                              | Low                                     | Low                                         | Low                              | Low                  | High      |
|                                                                         | Satisfaction                                                      | Some con-<br>cerns                      | High                                             | Low                                     | Low                                         | Low                              | High                 |           |
|                                                                         | Attendance                                                        | Some con-<br>cerns                      | High                                             | Low                                     | Low                                         | Low                              | High                 |           |
| Steffen, 2017<br>[11]; Kinney,<br>2016 [12];<br>Chang, 2016<br>[13]     | Psychosocial                                                      | Low                                     | Some con-<br>cerns                               | Low                                     | Low                                         | Low                              | Some con-<br>cerns   | High      |
|                                                                         | Genetic testing<br>uptake                                         | Low                                     | Some con-<br>cerns                               | High                                    | Low                                         | Low                              | High                 |           |
|                                                                         | Counselling<br>moderators of<br>genetic test-<br>ing <sup>1</sup> | Low                                     | Some con-<br>cerns                               | High                                    | Low                                         | Low                              | High                 |           |
|                                                                         | Cost                                                              | Low                                     | Low                                              | Low                                     | Low                                         | Low                              | Low                  |           |
| Jacobs, 2016<br>[14]; Peshkin,<br>2016 [15];<br>Schwartz,<br>2014 [16]; | Knowledge                                                         | Low                                     | Low                                              | Low                                     | Low                                         | Low                              | Low                  | Low       |
|                                                                         | Patient satis-<br>faction                                         | Low                                     | Low                                              | Low                                     | Low                                         | Low                              | Low                  |           |
|                                                                         | Decision con-<br>flict                                            | Low                                     | Low                                              | Low                                     | Low                                         | Low                              | Low                  |           |

<sup>1</sup> Cancer-specific distress, perceived risk of a genetic mutation compared to population risk, counselor patient-centeredness, cost barriers, decisional conflict, education, social support, family history of cancer

|                                                        |                                          |               |               |               |               |               |      |      |
|--------------------------------------------------------|------------------------------------------|---------------|---------------|---------------|---------------|---------------|------|------|
| Butrick, 2015 [17]                                     | Distress                                 | Low           | Low           | Low           | Low           | Low           | Low  |      |
|                                                        | Genetic counsellor questionnaire         | Low           | Low           | Low           | Low           | Low           | Low  |      |
| Kelleher, 2019 [18]; Winger, 2020 [19]                 | Access <sup>2</sup>                      | Low           | High          | Some concerns | Low           | Low           | High | High |
|                                                        | Pain <sup>3</sup>                        | High          | High          | Some concerns | Low           | Some concerns | High |      |
|                                                        | Symptoms, distress <sup>4</sup>          | High          | High          | Some concerns | Low           | Some concerns | High |      |
| Walle, 2018, 2020 [20,21]                              | Feasibility                              | Low           | Low           | Low           | Low           | Low           | Low  | High |
|                                                        | Patient cost                             | Some concerns | Some concerns | Some concerns | Low           | Low           | High |      |
|                                                        | Patient time                             | Some concerns | Some concerns | Some concerns | Low           | Low           | High |      |
|                                                        | Satisfaction                             | Some concerns | Some concerns | Some concerns | Low           | Low           | High |      |
|                                                        | Physician-patient relationship           | Some concerns | Some concerns | Some concerns | Low           | Low           | High |      |
| Beaver, 2017 [22]; Dixon, 2018 [23]; Beaver, 2020 [24] | Psychological morbidity                  | Low           | Low           | Low           | Low           | Low           | Low  | Low  |
|                                                        | Satisfaction                             | Low           | Low           | Low           | Low           | Low           | Low  |      |
|                                                        | Quality of life                          | Low           | Low           | Low           | Low           | Low           | Low  |      |
| Viers, 2015 [25]                                       | Recurrence                               | Low           | Low           | Low           | Low           | Low           | Low  | High |
|                                                        | Efficiency (duration of visit + waiting) | Some concerns | Some concerns | Some concerns | Some concerns | Low           | High |      |
|                                                        | Satisfaction                             | Some concerns | Some concerns | Some concerns | Some concerns | Low           | High |      |
|                                                        | Patient cost                             | Some concerns | High |      |

<sup>2</sup> Aim 1: intervention access (feasibility [attrition, adherence, completion time], patient burden [physical, emotional, financial], engagement, acceptability)

<sup>3</sup> Aim 2: primary outcomes: pain severity and pain interference

<sup>4</sup> Aim 2: secondary outcomes: physical well-being and symptoms, psychological distress, self-efficacy for pain management

## References:

1. Chua, I.S.; Zachariah, F.; Dale, W.; Feliciano, J.; Hanson, L.; Blackhall, L.; Quest, T.; Curseen, K.; Grey, C.; Rhodes, R.; et al. Early integrated telehealth versus in-person palliative care for patients with advanced lung cancer: A study protocol. *J Palliat Med* **2019**, *22*, 7-19, doi:<http://dx.doi.org/10.1089/jpm.2019.0210>.
2. National Library of Medicine (US). Telemedicine nurse-led intervention for rural cancer survivors. <https://clinicaltrials.gov/show/NCT04267627> **2020**.
3. Australian and New Zealand Clinical Trials Registry [Internet]. Telehealth for palliative care patients in metropolitan and rural settings. Sydney (NSW): NHMRC Clinical Trials Centre, University of Sydney (Australia), 2018. Available from: <https://anzctr.org.au/Trial/Registration/TrialReview.aspx?ACTRN=12618001007224> (assessed Aug 7, 2020). **2018**.
4. National Library of Medicine (US). Supportive care delivered by telemedicine to cancer patients at home. <https://clinicaltrials.gov/show/NCT04136340> **2019**.
5. National Library of Medicine (US). Assessing the system for high-intensity evaluation during radiotherapy during changes in response to COVID-19 (CORONA-SHIELD). <https://clinicaltrials.gov/ct2/show/NCT04357574>. **2020**.
6. Lleras de Frutos, M.; Medina, J.C.; Vives, J.; Casellas-Grau, A.; Marzo, J.L.; Borrás, J.M.; Ochoa-Arnedo, C. Video conference vs face-to-face group psychotherapy for distressed cancer survivors: A randomized controlled trial. *Psychooncology* **2020**, *03*, 03, doi:<http://dx.doi.org/10.1002/pon.5457>.
7. Watson, M.; White, C.; Lynch, A.; Mohammed, K. Telephone-delivered individual cognitive behavioural therapy for cancer patients: An equivalence randomised trial. *Psychooncology* **2017**, *26*, 301-308, doi:<http://dx.doi.org/10.1002/pon.4338>.
8. Harrigan, M.; Cartmel, B.; Loftfield, E.; Sanft, T.; Chagpar, A.B.; Zhou, Y.; Playdon, M.; Li, F.; Irwin, M.L. Randomized trial comparing telephone versus in-person weight loss counseling on body composition and circulating biomarkers in women treated for breast cancer: The Lifestyle, Exercise, and Nutrition (LEAN) Study. *J Clin Oncol* **2016**, *34*, 669-676, doi:<http://dx.doi.org/10.1200/JCO.2015.61.6375>.
9. Buchanan, A.H.; Datta, S.K.; Skinner, C.S.; Hollowell, G.P.; Beresford, H.F.; Freeland, T.; Rogers, B.; Boling, J.; Marcom, P.K.; Adams, M.B. Randomized trial of telegenetics vs. in-person cancer genetic counseling: Cost, patient satisfaction and attendance. *J Genet Couns* **2015**, *24*, 961-970, doi:<https://dx.doi.org/10.1007/s10897-015-9836-6>.
10. Datta, S.K.; Buchanan, A.H.; Hollowell, G.P.; Beresford, H.F.; Marcom, P.K.; Adams, M.B. Telemedicine vs in-person cancer genetic counseling: Measuring satisfaction and conducting economic analysis. *Comp Eff Res (Auckl)* **2011**, *1*, 43-50, doi:<http://dx.doi.org/10.2147/CER.S19179>.
11. Steffen, L.E.; Du, R.; Gammon, A.; Mandelblatt, J.S.; Kohlmann, W.K.; Lee, J.H.; Buys, S.S.; Stroup, A.M.; Campo, R.A.; Flores, K.G.; et al. Genetic testing in a population-based sample of breast and ovarian cancer survivors from the REACH randomized trial: Cost barriers and moderators of counseling mode. *Cancer Epidemiol Biomarkers Prev* **2017**, *26*, 1772-1780, doi:<http://dx.doi.org/10.1158/1055-9965.EPI-17-0389>.
12. Kinney, A.Y.; Steffen, L.E.; Brumbach, B.H.; Kohlmann, W.; Du, R.; Lee, J.H.; Gammon, A.; Butler, K.; Buys, S.S.; Stroup, A.M.; et al. Randomized noninferiority trial of telephone delivery of BRCA1/2 genetic counseling compared with in-person counseling: 1-year follow-up. *J Clin Oncol* **2016**, *34*, 2914-2924, doi:<http://dx.doi.org/10.1200/JCO.2015.65.9557>.
13. Chang, Y.; Near, A.M.; Butler, K.M.; Hoeffken, A.; Edwards, S.L.; Stroup, A.M.; Kohlmann, W.; Gammon, A.; Buys, S.S.; Schwartz, M.D.; et al. Economic evaluation alongside a clinical trial of telephone versus in-person genetic counseling for BRCA1/2 mutations in geographically underserved areas. *J Oncol Pract* **2016**, *12*, e1-e13, doi:<http://dx.doi.org/10.1200/JOP.2015.004838>.
14. Jacobs, A.S.; Schwartz, M.D.; Valdimarsdottir, H.; Nusbaum, R.H.; Hooker, G.W.; DeMarco, T.A.; Heinzmann, J.E.; McKinnon, W.; McCormick, S.R.; Davis, C.; et al. Patient and genetic counselor perceptions of in-person versus telephone genetic counseling for hereditary breast/ovarian cancer. *Fam Cancer* **2016**, *15*, 529-539, doi:<http://dx.doi.org/10.1007/s10689-016-9900-x>.
15. Peshkin, B.N.; Kelly, S.; Nusbaum, R.H.; Similuk, M.; DeMarco, T.A.; Hooker, G.W.; Valdimarsdottir, H.B.; Forman, A.D.; Joines, J.R.; Davis, C.; et al. Patient perceptions of telephone vs. in-person BRCA1/BRCA2 genetic counseling. *J Genet Couns* **2016**, *25*, 472-482, doi:[10.1007/s10897-015-9897-6](https://doi.org/10.1007/s10897-015-9897-6).
16. Schwartz, M.D.; Valdimarsdottir, H.B.; Peshkin, B.N.; Mandelblatt, J.; Nusbaum, R.; Huang, A.-T.; Chang, Y.; Graves, K.; Isaacs, C.; Wood, M.; et al. Randomized noninferiority trial of telephone versus in-person genetic counseling for hereditary breast and ovarian cancer. *J Clin Oncol* **2014**, *32*, 618-626, doi:[10.1200/JCO.2013.51.3226](https://doi.org/10.1200/JCO.2013.51.3226).
17. Buttrick, M.; Kelly, S.; Peshkin, B.N.; Luta, G.; Nusbaum, R.; Hooker, G.W.; Graves, K.; Feeley, L.; Isaacs, C.; Valdimarsdottir, H.B.; et al. Disparities in uptake of BRCA1/2 genetic testing in a randomized trial of telephone counseling. *Genet Med* **2015**, *17*, 467-475, doi:[10.1038/gim.2014.125](https://doi.org/10.1038/gim.2014.125).
18. Kelleher, S.A.; Winger, J.G.; Dorfman, C.S.; Ingle, K.K.; Moskovich, A.A.; Abernethy, A.P.; Keefe, F.J.; Samsa, G.P.; Kimmick, G.G.; Somers, T.J. A behavioral cancer pain intervention: A randomized noninferiority trial comparing in-person with videoconference delivery. *Psychooncology* **2019**, *28*, 1671-1678, doi:<http://dx.doi.org/10.1002/pon.5141>.
19. Winger, J.G.; Nunez, C.; Kelleher, S.A.; Ingle, K.K.; Gandhi, V.; Keefe, F.J.; Somers, T.J. Predictors of intervention session completion in a randomized clinical trial of a behavioral cancer pain intervention. *J Pain Symptom Manage* **2020**, *59*, 1268-1277, doi:<http://dx.doi.org/10.1016/j.jpainsymman.2020.01.020>.
20. Walle, T. NCT MOBILE - smartphone-based video consultations in medical oncology. <http://www.drks.de/DRKS00015788> [cited 2020 Oct 29]. **2018**, doi:<http://www.who.int/trialsearch/Trial2.aspx?TrialID=DRKS00015788>.

21. Walle, T.; Erdal, E.; Mühlsteffen, L.; Singh, H.M.; Gnutzmann, E.; Grün, B.; Hofmann, H.; Ivanova, A.; Köhler, B.; Korell, F.; et al. Completion rate and impact on physician-patient relationship of video consultations in medical oncology: A randomized controlled open label trial. <http://dx.doi.org/10.1136/esmoopen-2020-000912> *ESMO Open* **2020**, *5*, e000912.
22. Beaver, K.; Williamson, S.; Sutton, C.; Hollingworth, W.; Gardner, A.; Allton, B.; Abdel-Aty, M.; Blackwood, K.; Burns, S.; Curwen, D.; et al. Comparing hospital and telephone follow-up for patients treated for stage-I endometrial cancer (ENDCAT trial): A randomised, multicentre, non-inferiority trial. *BJOG* **2017**, *124*, 150-160, doi:10.1111/1471-0528.14000.
23. Dixon, P.; Beaver, K.; Williamson, S.; Sutton, C.; Martin-Hirsch, P.; Hollingworth, W. Cost-consequence analysis alongside a randomised controlled trial of hospital versus telephone follow-up after treatment for endometrial cancer. *Appl Health Econ Health Policy* **2018**, *16*, 415-427, doi:<http://dx.doi.org/10.1007/s40258-018-0378-6>.
24. Beaver, K.; Williamson, S.; Sutton, C.J.; Gardner, A.; Martin-Hirsch, P. Endometrial cancer patients' preferences for follow-up after treatment: A cross-sectional survey. *Eur J Oncol Nurs* **2020**, *45*, N.PAG-N.PAG, doi:<http://dx.doi.org/10.1016/j.ejon.2020.101722>.
25. Viers, B.R.; Lightner, D.J.; Rivera, M.E.; Tollefson, M.K.; Boorjian, S.A.; Karnes, R.J.; Thompson, R.H.; O'Neil, D.A.; Hamilton, R.L.; Gardner, M.R.; et al. Efficiency, satisfaction, and costs for remote video visits following radical prostatectomy: A randomized controlled trial. *Eur Urol* **2015**, *68*, 729-735, doi:<http://dx.doi.org/10.1016/j.eururo.2015.04.002>.
